# Supplementary material
Source: HighWire-hosted journal article supplement (http://www.qdcxjkg.com/highwire/filestream/113894/field_highwire_adjunct_files/0/ERJ-01808-2012_Disclosures.pdf)
Supplement: ERJ-01808-2012_Disclosures.pdf [file ERJ-01808-2012_Disclosures.pdf]

B. Beghè has received payment for lectures, advisory boards or travel expenses reimbursements from: AstraZeneca, Chiesi farmaceutici, Menarini Industrie Farmaceutiche, Nycomed and payment for development of educational presentations from Nycomed.

L.M. Fabbri received payment for consultancy from: Boehringer Ingelheim, Chiesi Farmaceutici, GlaxoSmithKline, Merck Sharp & Dhome, Novartis, Nycomed, Pearl Therapeutics, Sigma-Tau, Sterna, Peer Voice Europe, OM Pharma Sa, TEVA; payment for lectures, advisory boards or travel expenses reimbursements from: AstraZeneca, Dey Pharma, Novartis, Schering Plough, Sigma-Tau, Roche, German Aerospace Center, Mundipharma Int., Genetech Inc, Elevation Pharmaceutical, Ferrer Group; his institution received grants from Boehringer Ingelheim, Schering Plough, Pfizer, Nycomed, Menarini Industrie Farmaceutiche, Chiesi Farmaceutici, GlaxoSmithKline, Merck Sharp & Dhome, Roche, AstraZeneca, Novartis, SigmaTau, Italian Ministry for University and Research, Italian Ministry of Health.
